# Supplementary material for: A neomorphic variant in SP7 alters sequence specificity and causes a high-turnover bone disorder
Source: PubMed Central journal article supplement (PMC8816926; doi:10.1038/s41467-022-28318-4), 2022-02-04
Supplement: 41467_2022_28318_MOESM4_ESM.pdf [file 41467_2022_28318_MOESM4_ESM.pdf]

**Title:** Supplemental Movie 1.

**Description:** Movie showing three-dimensional whole skeleton micro-CT imaging of newborn wild-type mouse.

**Title:** Supplemental Movie 2.

**Description:** showing three-dimensional whole skeleton micro-CT imaging of newborn S309W heterozygous knock-in mouse.

**Title:** Supplemental Movie 3.

**Description:** Movie showing three-dimensional whole skeleton micro-CT imaging of newborn S309W homozygous knock-in mouse.

**Title:** Supplemental Movie 4.

**Description:** Movie showing three-dimensional whole skeleton micro-CT imaging of 3 weeks old wild-type mouse.

**Title:** Supplemental Movie 5.

**Description:** Movie showing three-dimensional whole skeleton micro-CT imaging of 3 weeks old S309W mosaic mouse.

**Title:** Supplemental Movie 6.

**Description:** Movie showing three-dimensional whole skeleton micro-CT imaging of 20 weeks old wild-type mouse.

**Title:** Supplemental Movie 7.

**Description:** Movie showing three-dimensional whole skeleton micro-CT imaging of 20 weeks old S309W mosaic mouse.

**Title:** Supplemental Data 1.

**Description:** Summary of mice generated using CRISPR Cas9.

**Title:** Supplemental Data 2.

**Description:** Summary of genotype and phenotype of the four S309W mosaic mice.

**Title:** Supplemental Data 3.

**Description:** Comparison between SP7-associated high turnover bone disorder and other forms of high turnover disorders.
